# Supplementary material
Source: MDPI journal article supplement (https://www.mdpi.com/2075-163X/11/1/74)
Supplement: s1 [file s1]

# **Supplementary Materials: Genomic Analysis of a Newly Isolated *Acidithiobacillus ferridurans* JAGS Strain Reveals Its Adaptation to Acid Mine Drainage**

Jinjin Chen, Yilan Liu, Patrick Diep and Radhakrishnan Mahadevan \*

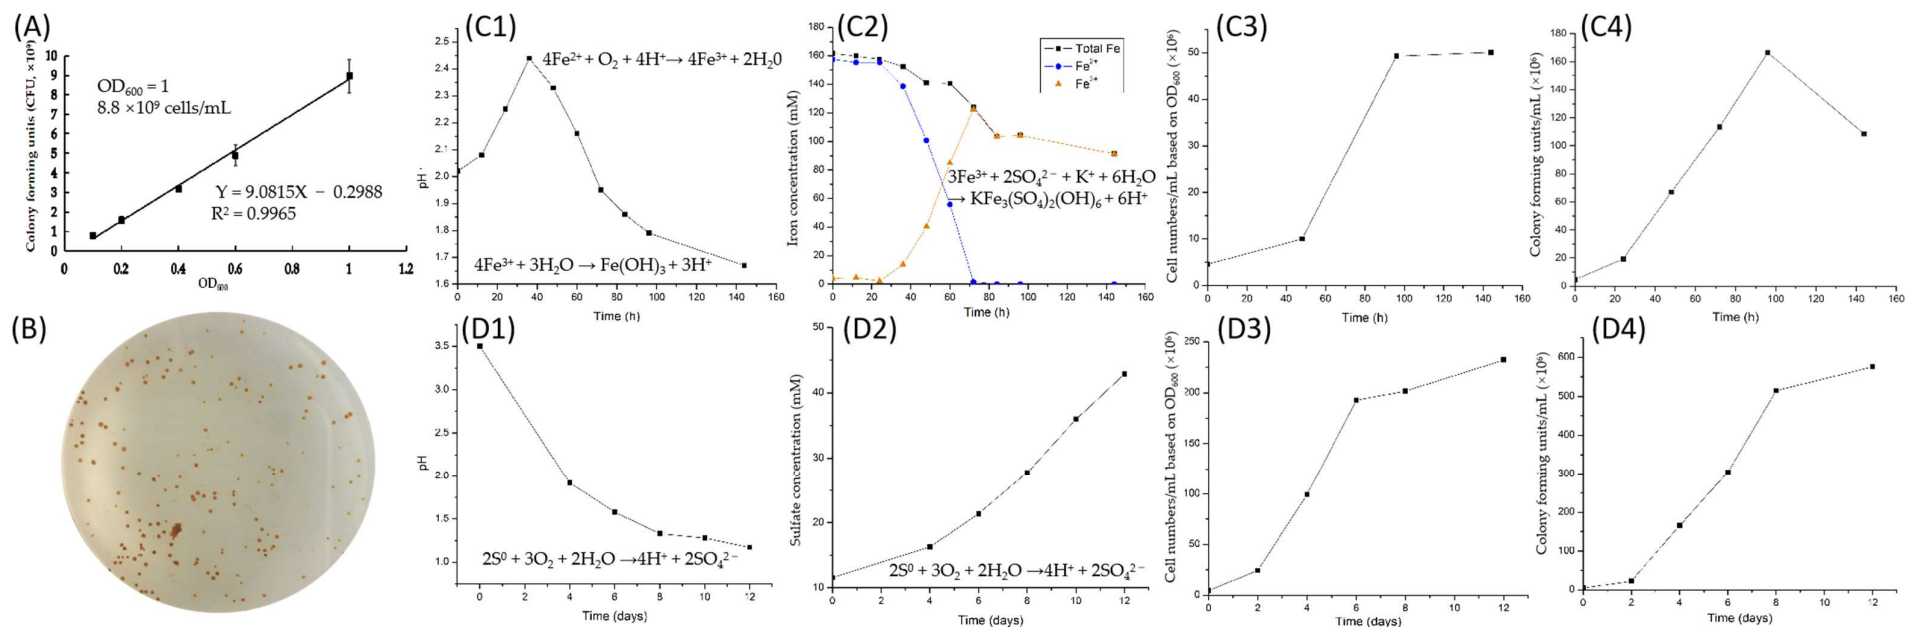

**Figure S1.** Growth features of *A. ferridurans* JAGS. **(A)** Standard curve of optical density ( $OD_{600}$ ) versus cell numbers obtained by plate count method. **(B)** Colonies on 2:2 solid medium for cell count. **(C)** Growth on 9K- $Fe^{2+}$  medium, **(C1)** pH value; **(C2)** Fe oxidation; **(C3)** cell numbers by  $OD_{600}$ ; **(C4)** cell numbers by plate count method. **(D)** Growth on 9K- $S^0$  medium, **(D1)** pH value; **(D2)** sulfur oxidation; **(D3)** cell count by  $OD_{600}$ ; **(D4)** cell numbers by plate count method.

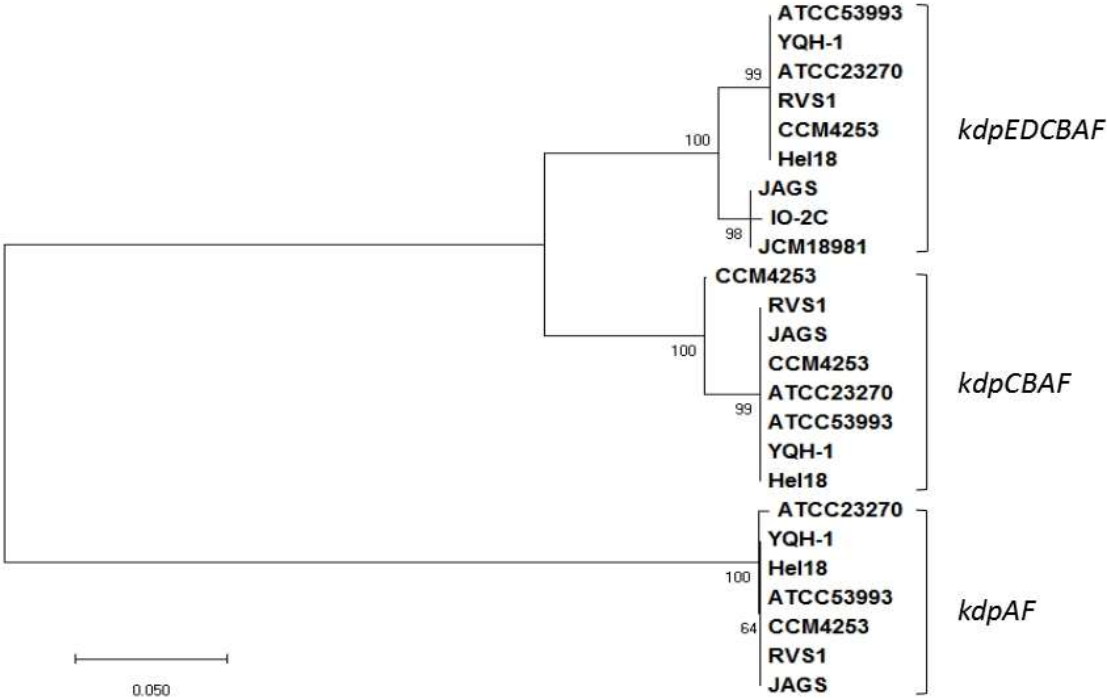

**Figure S2.** Neighbor-joining (NJ) phylogenetic tree of the *kdpA* protein sequences derived from nine *Acidithiobacillus* strains. Bootstrap values indicated at each node are based on a total of 500 bootstrap replicates.

**Table S1.** Average nucleotide identity (ANI) (%) based on whole-genome alignments among *Acidithiobacillus* strains by JSpeciesWS.

| *                                | <i>A. ferriidurans</i><br>JAGS | <i>A. ferriidurans</i><br>JCM18981 | <i>A. ferrooxidans</i><br>IO-2C | <i>A. ferrooxidans</i><br>ATCC53993 | <i>A. ferrooxidans</i><br>RVS1 | <i>A. ferrooxidans</i><br>CCM4253 | <i>A. ferrooxidans</i><br>YQH1 | <i>A. ferrooxidans</i><br>Hel18 | <i>A. ferrooxidans</i><br>ATCC23270 |
|----------------------------------|--------------------------------|------------------------------------|---------------------------------|-------------------------------------|--------------------------------|-----------------------------------|--------------------------------|---------------------------------|-------------------------------------|
| <i>A. ferriidurans</i> JAGS      | *                              | 99.66                              | 99.23                           | 95.51                               | 95.33                          | 95.32                             | 95.34                          | 95.34                           | 95.37                               |
| <i>A. ferriidurans</i> JCM18981  | 99.13                          | *                                  | 99.22                           | 95.13                               | 95.08                          | 95.07                             | 95.05                          | 95.06                           | 95.12                               |
| <i>A. ferrooxidans</i> IO-2C     | 98.69                          | 98.18                              | *                               | 95.32                               | 95.27                          | 95.26                             | 95.26                          | 95.26                           | 95.52                               |
| <i>A. ferrooxidans</i> ATCC53993 | 94.98                          | 94.11                              | 94.89                           | *                                   | 99.86                          | 99.78                             | 99.8                           | 99.8                            | 99.87                               |
| <i>A. ferrooxidans</i> RVS1      | 94.68                          | 93.97                              | 94.79                           | 99.57                               | *                              | 99.94                             | 99.95                          | 99.95                           | 99.84                               |
| <i>A. ferrooxidans</i> CCM4253   | 94.70                          | 93.83                              | 94.79                           | 99.49                               | 99.92                          | *                                 | 99.97                          | 99.98                           | 99.82                               |
| <i>A. ferrooxidans</i> YQH1      | 94.71                          | 93.83                              | 94.8                            | 99.5                                | 99.93                          | 99.97                             | *                              | 99.99                           | 99.83                               |
| <i>A. ferrooxidans</i> Hel18     | 94.69                          | 93.83                              | 94.77                           | 99.49                               | 99.91                          | 99.97                             | 99.97                          | *                               | 99.82                               |
| <i>A. ferrooxidans</i> ATCC23270 | 94.76                          | 94.00                              | 94.81                           | 99.64                               | 99.56                          | 98.93                             | 99.1                           | 99.04                           | *                                   |

Note: lower matrix ANIb, upper matrix ANIm.

**Table S2.** Genes predicted to be involved in acid and heavy metal tolerance in *A. ferriidurans* JAGS.

| Protein                                                        | Gene ID           |
|----------------------------------------------------------------|-------------------|
| Acid Stress Resistance                                         | -                 |
| OMP40, outer membrane protein.                                 | F6A13_00370       |
| HpnB, glycosyltransferase.                                     | F6A13_01630       |
| HpnMHNKJIAG cluster, hopanoid-associated proteins.             | F6A13_09105-09150 |
| Shc, squalene-hopene cyclase (EC 5.4.99.17).                   | F6A13_09155       |
| Sqs, squalene synthase (EC 2.5.1.21).                          | F6A13_09160       |
| kdpD, osmosensitive K <sup>+</sup> channel histidine kinase    | F6A13_02550       |
| KdpEDFABC cluster, a kdp-type potassium uptake ATPase system.  | F6A13_09580-09605 |
| KdpCBFAFAF cluster, a kdp-type potassium uptake ATPase system. | F6A13_11005-11030 |
| TrkA, Voltage-gated potassium channel protein.                 | F6A13_13725       |
| NhaA, Na <sup>+</sup> /H <sup>+</sup> antiporter.              | F6A13_09475       |
| putative Na <sup>+</sup> /H <sup>+</sup> antiporter.           | F6A13_04755       |
| SpeA, biosynthetic arginine decarboxylase (EC 4.1.1.19).       | F6A13_06090       |
| PanD, aspartate 1-decarboxylase (EC 4.1.1.11).                 | F6A13_14595       |
| Psd, phosphatidylserine decarboxylase (EC 4.1.1.65).           | F6A13_04545       |
| ClpB, chaperone protein ClpB (ATP-dependent unfoldase).        | F6A13_08410       |
| DnaJK, chaperone proteins.                                     | F6A13_12450-12455 |
| GrpE, heat shock protein.                                      | F6A13_12460       |
| RadA, DNA repair protein.                                      | F6A13_13190       |
| DnaB, replicative DNA helicase (DnaB) (EC 3.6.4.12).           | F6A13_13200       |

|                                                                                                                                                                                                                                                                                  |                                                                                                                                                                                                                                           |
|----------------------------------------------------------------------------------------------------------------------------------------------------------------------------------------------------------------------------------------------------------------------------------|-------------------------------------------------------------------------------------------------------------------------------------------------------------------------------------------------------------------------------------------|
| RecA, DNA repair protein.                                                                                                                                                                                                                                                        | F6A13_05400                                                                                                                                                                                                                               |
| LexA-ImuAB-DnaE cluster: LexA, SOS-response repressor and protease LexA<br>(EC 3.4.21.88); ImuA, RecA/RadA recombinase; ImuB, DNA polymerase IV-like protein;<br>DnaE, error-prone repair homolog of DNA polymerase III alpha subunit (EC 2.7.7.7).                              | F6A13_07785-07800                                                                                                                                                                                                                         |
| <b>Heavy-Metal Resistance</b>                                                                                                                                                                                                                                                    | -                                                                                                                                                                                                                                         |
| Lead, cadmium, zinc and mercury transporting ATPase (EC 3.6.3.3) (EC 3.6.3.5);<br>Copper-translocating P-type ATPase (EC 3.6.3.4).<br>MgtA, Magnesium (Mg <sup>2+</sup> ) transport ATPase, P-type (EC 3.6.3.2)<br>CopZ, Copper(I) chaperone<br>RND efflux system (Ni/Co/Cd/Zn). | F6A13_04860, 04905, 04925, 04945,<br>08625, 10865, 10890, 11740<br>F6A13_09840<br>F6A13_04870, 07760, 10900<br>F6A13_08730-08740, 15065-15075<br>F6A13_00815-00825, 07835-07845,<br>08240-08250, 08695-08705,<br>10835-10845, 11760-11770 |
| CzcABC family RND transporter system (Ni/Mn/Fe/Mo).                                                                                                                                                                                                                              | F6A13_05895, 06205, 08215, 10785                                                                                                                                                                                                          |
| CzcA/D, Co/Zn/Cd resistance proteins.                                                                                                                                                                                                                                            | F6A13_03815-03830                                                                                                                                                                                                                         |
| ZnuACBB, Zinc ABC transporter system.                                                                                                                                                                                                                                            | F6A13_14780-14795                                                                                                                                                                                                                         |
| CorA, Mg/Co transport proteins.                                                                                                                                                                                                                                                  | F6A13_03800, 08900                                                                                                                                                                                                                        |
| CorC, Mg/Co transport proteins                                                                                                                                                                                                                                                   | F6A13_13815                                                                                                                                                                                                                               |
| Cation-transporting ATPase                                                                                                                                                                                                                                                       | F6A13_00710-00725                                                                                                                                                                                                                         |
| MerRTPA, Hg resistance.                                                                                                                                                                                                                                                          | F6A13_11040-11055                                                                                                                                                                                                                         |
| MerCAD, Hg resistance.                                                                                                                                                                                                                                                           | F6A13_09070                                                                                                                                                                                                                               |
| ArsM, Arsenite methyltransferase (EC 2.1.1.137)                                                                                                                                                                                                                                  | F6A13_10625-10635;                                                                                                                                                                                                                        |
| ArsADC, As resistance.                                                                                                                                                                                                                                                           | F6A13_13380-13405                                                                                                                                                                                                                         |
| ArsHBRCD, As resistance.                                                                                                                                                                                                                                                         | F6A13_13430, 13435                                                                                                                                                                                                                        |
| ArsRC, As resistance.                                                                                                                                                                                                                                                            | F6A13_00800, 05345                                                                                                                                                                                                                        |
| MntH, Manganese transport protein.                                                                                                                                                                                                                                               |                                                                                                                                                                                                                                           |
